# Supplementary material for: Efficacy of PIVKA-II in prediction and early detection of hepatocellular carcinoma: a nested case-control study in Chinese patients
Source: PubMed Central journal article supplement (PMC5059731; doi:10.1038/srep35050), 2016-10-12
Supplement: srep35050-s1.pdf [file srep35050-s1.pdf]

Supplementary materials to:

**Efficacy of PIVKA-II in prediction and early detection of hepatocellular carcinoma:  
a nested case-control study in Chinese patients**

Yu Rentao<sup>1,2</sup>, Xiang Xiaomei<sup>1,2</sup>, Tan Zhaoxia<sup>1,2</sup>, Zhou Yi<sup>1,2</sup>, Wang Haoliang<sup>3</sup>, Deng Guohong<sup>1,2,3</sup>

<sup>1</sup> Department of Infectious Diseases, Southwest Hospital, the Third Military Medical University, Chongqing, China

<sup>2</sup> Chongqing Key Laboratory of Infectious Diseases, Southwest Hospital, Third Military Medical University, Chongqing, China

<sup>3</sup> Institute of Immunology, Third Military Medical University, Chongqing, China

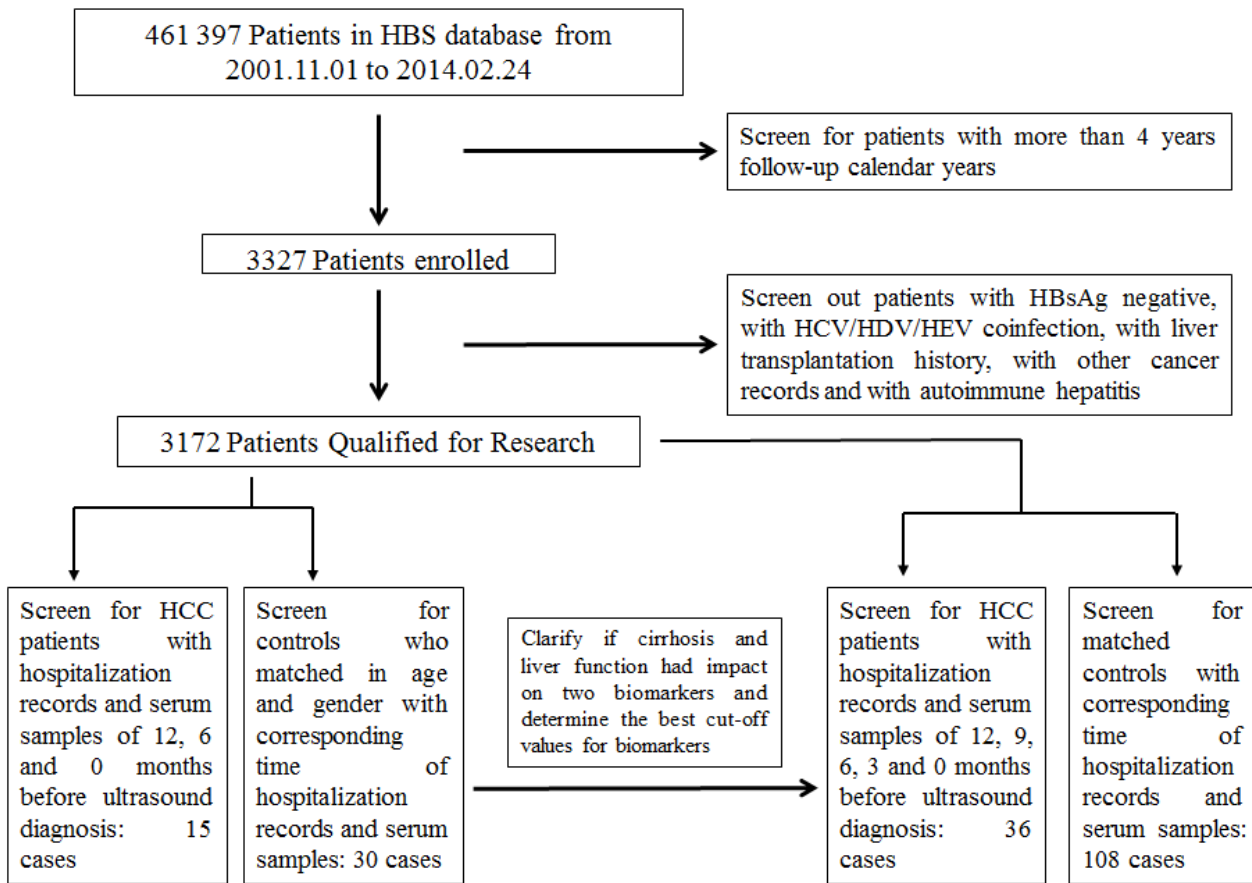

**Supplementary Fig. 1 Flow chart representing the selection procedure based on the HBS cohort**

**dataset.** All HCC patients were checked for hospitalization records and sera samples and patients with regular follow-up records were selected for use. Totally, 51 cases (most were early-stage HCC) were qualified. In the end, 15 cases with -12, -6 and 0 months before diagnosis were classified into discovery stage and for each case, 2 controls were selected from the same cohort dataset for matching. So did the validation stage, but there were 1:3 matched controls in validation stage.

**Supplementary Table 1** Multivariable analysis of HCC in discovery stage.

|                   | <b>AFP</b> | <b>PIVKA</b> | <b>gender</b> | <b>age</b> | <b>cirrhosis</b> | <b>AST</b> | <b>ALT</b> | <b>ALP</b> | <b>TBIL</b> | <b>TBA</b> | <b>TP</b> | <b>IgDNA</b> |
|-------------------|------------|--------------|---------------|------------|------------------|------------|------------|------------|-------------|------------|-----------|--------------|
| <b>P</b>          | 0.019      | 0.022        | 0.921         | 0.261      | 0.473            | 0.212      | 0.296      | 0.142      | 0.518       | 0.632      | 0.12      | 0.398        |
| <b>OR</b>         | 11.086     | 11.023       | 0.002         | 0.912      | 7.528            | 0.808      | 1.327      | 0.928      | 1.1         | 0.93       | 2.292     | 0.522        |
| <b>95%<br/>CI</b> | 0.893      | 0.986        | 4.77E-57      | 0.776      | 3.55             | 0.578      | 0.78       | 0.84       | 0.824       | 0.692      | 0.805     | 0.116        |
|                   | 1.321      | 1.062        | 8.28E+50      | 1.071      | 13.845           | 1.13       | 2.258      | 1.025      | 1.468       | 1.25       | 6.526     | 2.358        |

In this binary logistic regression, the state of HCC was set as dependent variable, and biomarkers, cirrhosis basis and bio-parameters reflecting liver function were set as covariates. AFP and PIVKA-II were risk factors for HCC and P values were below 0.05. OR, odds ratio; CI, confidential interval.

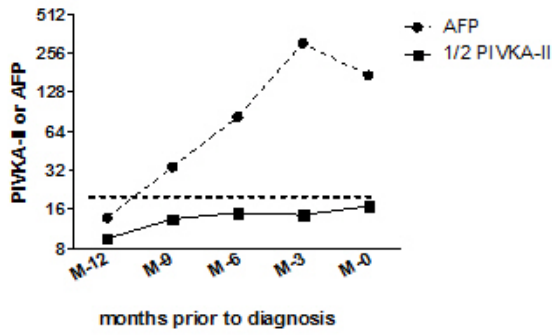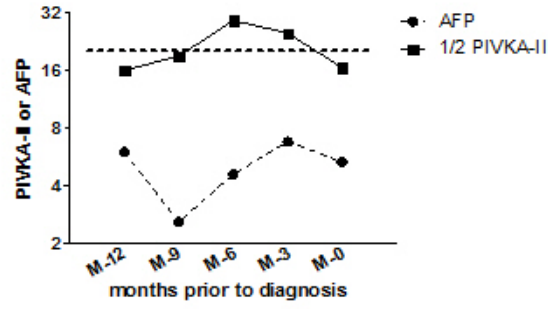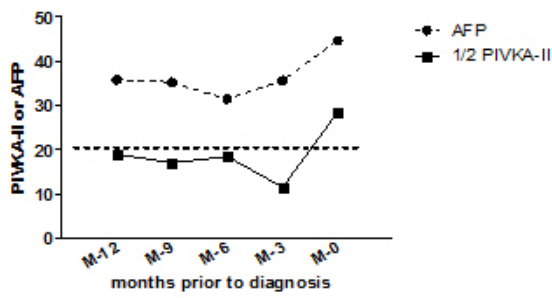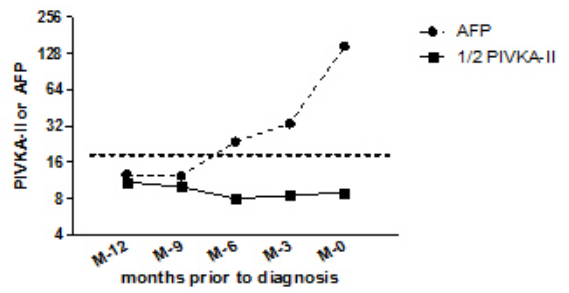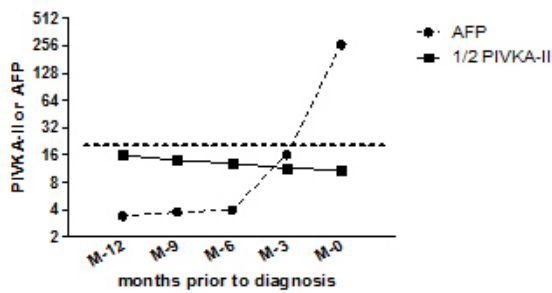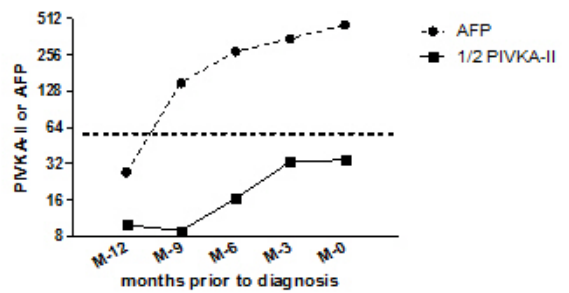

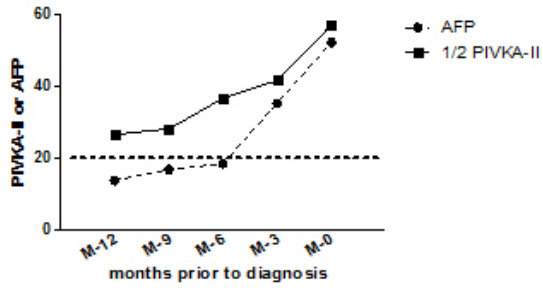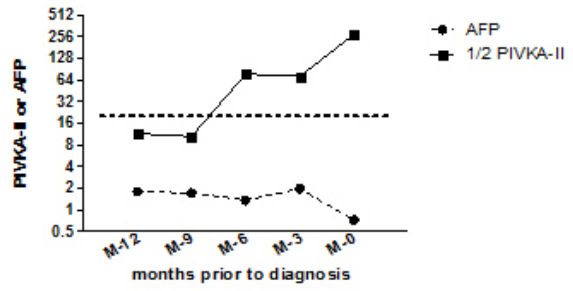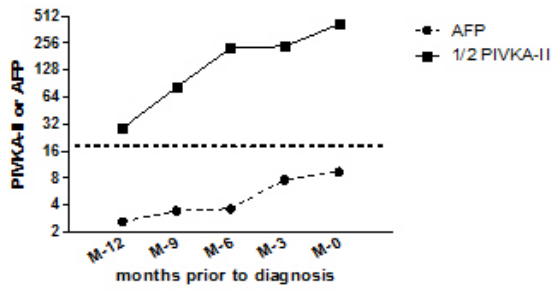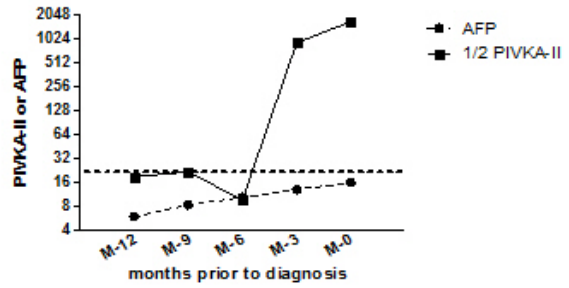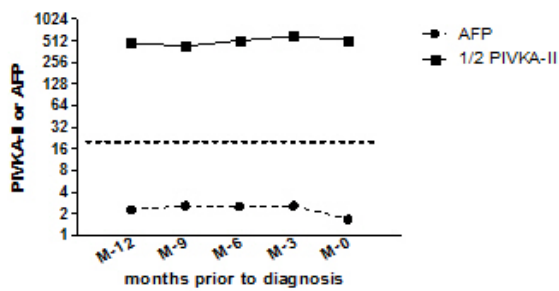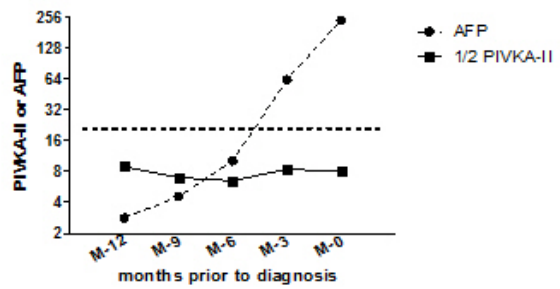

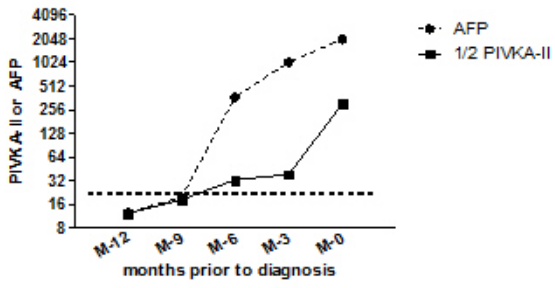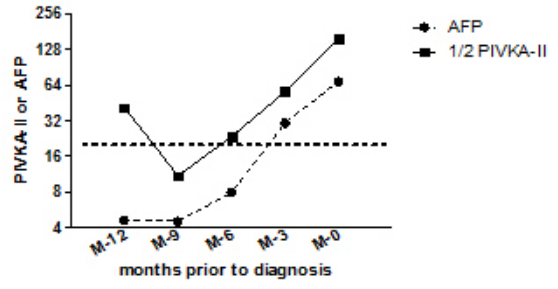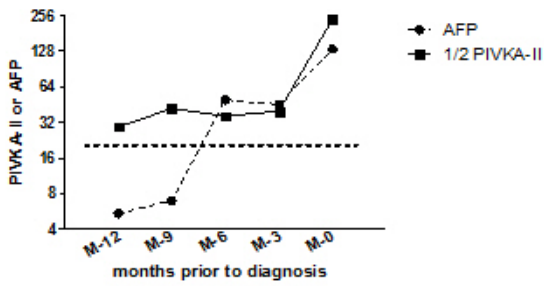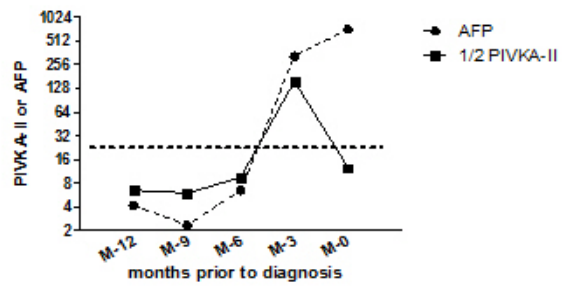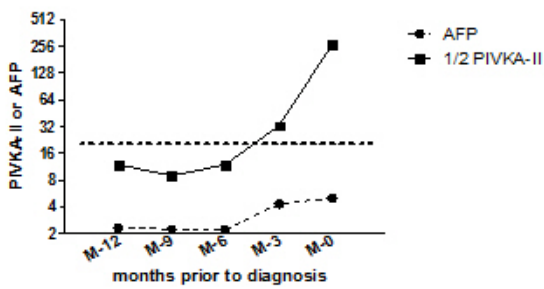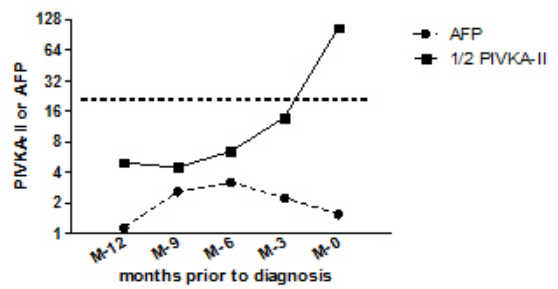

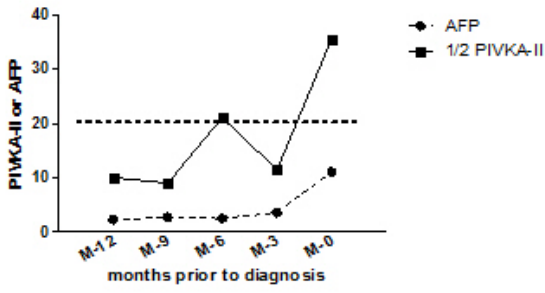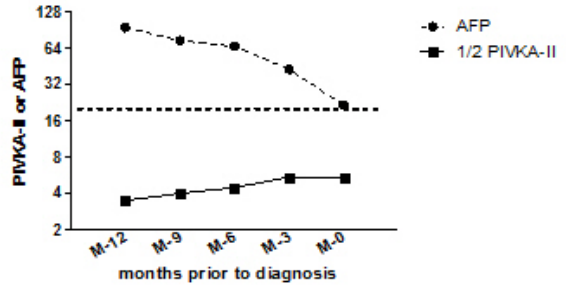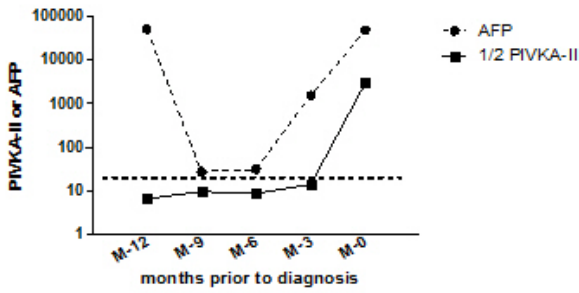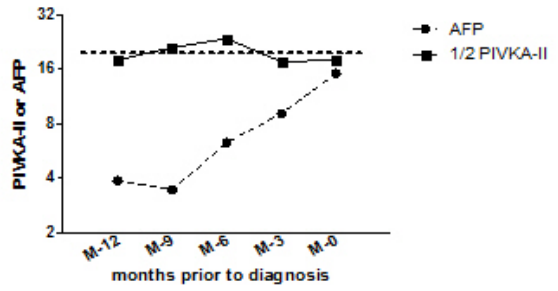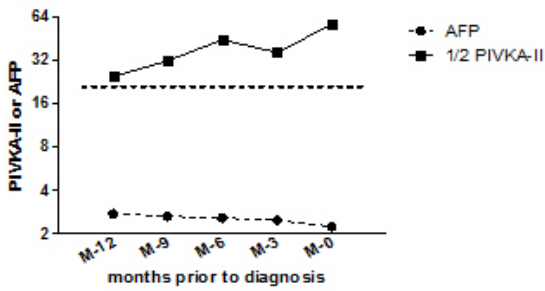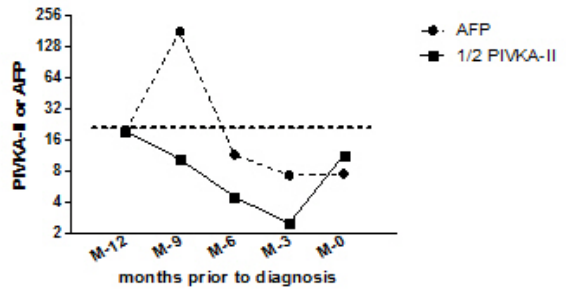

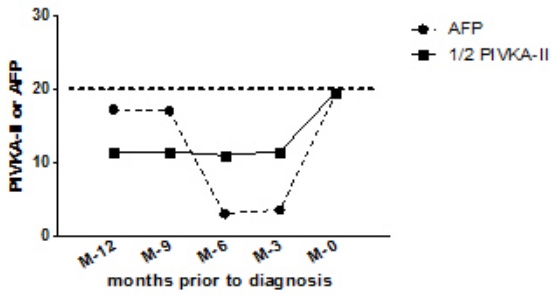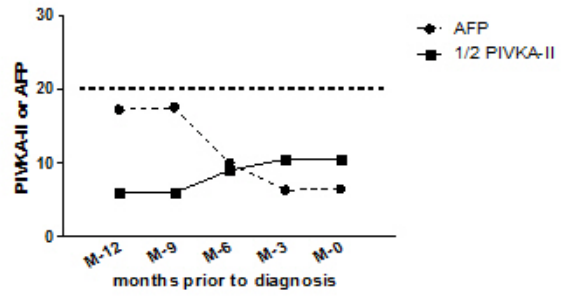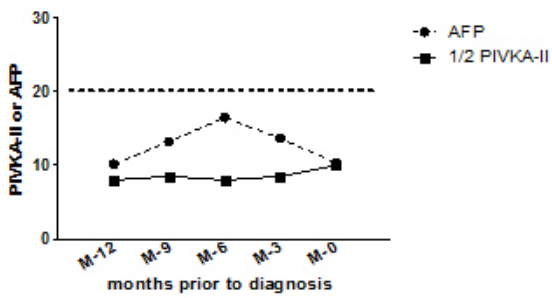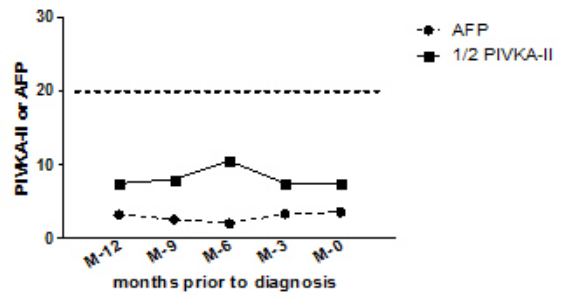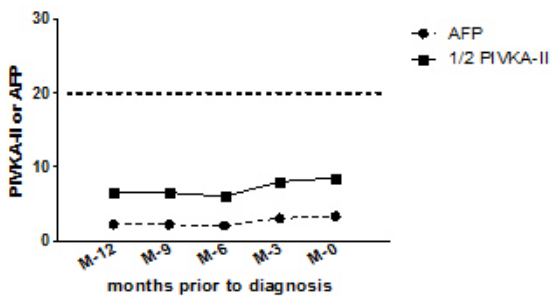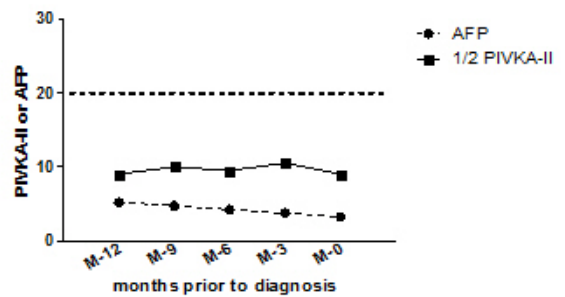



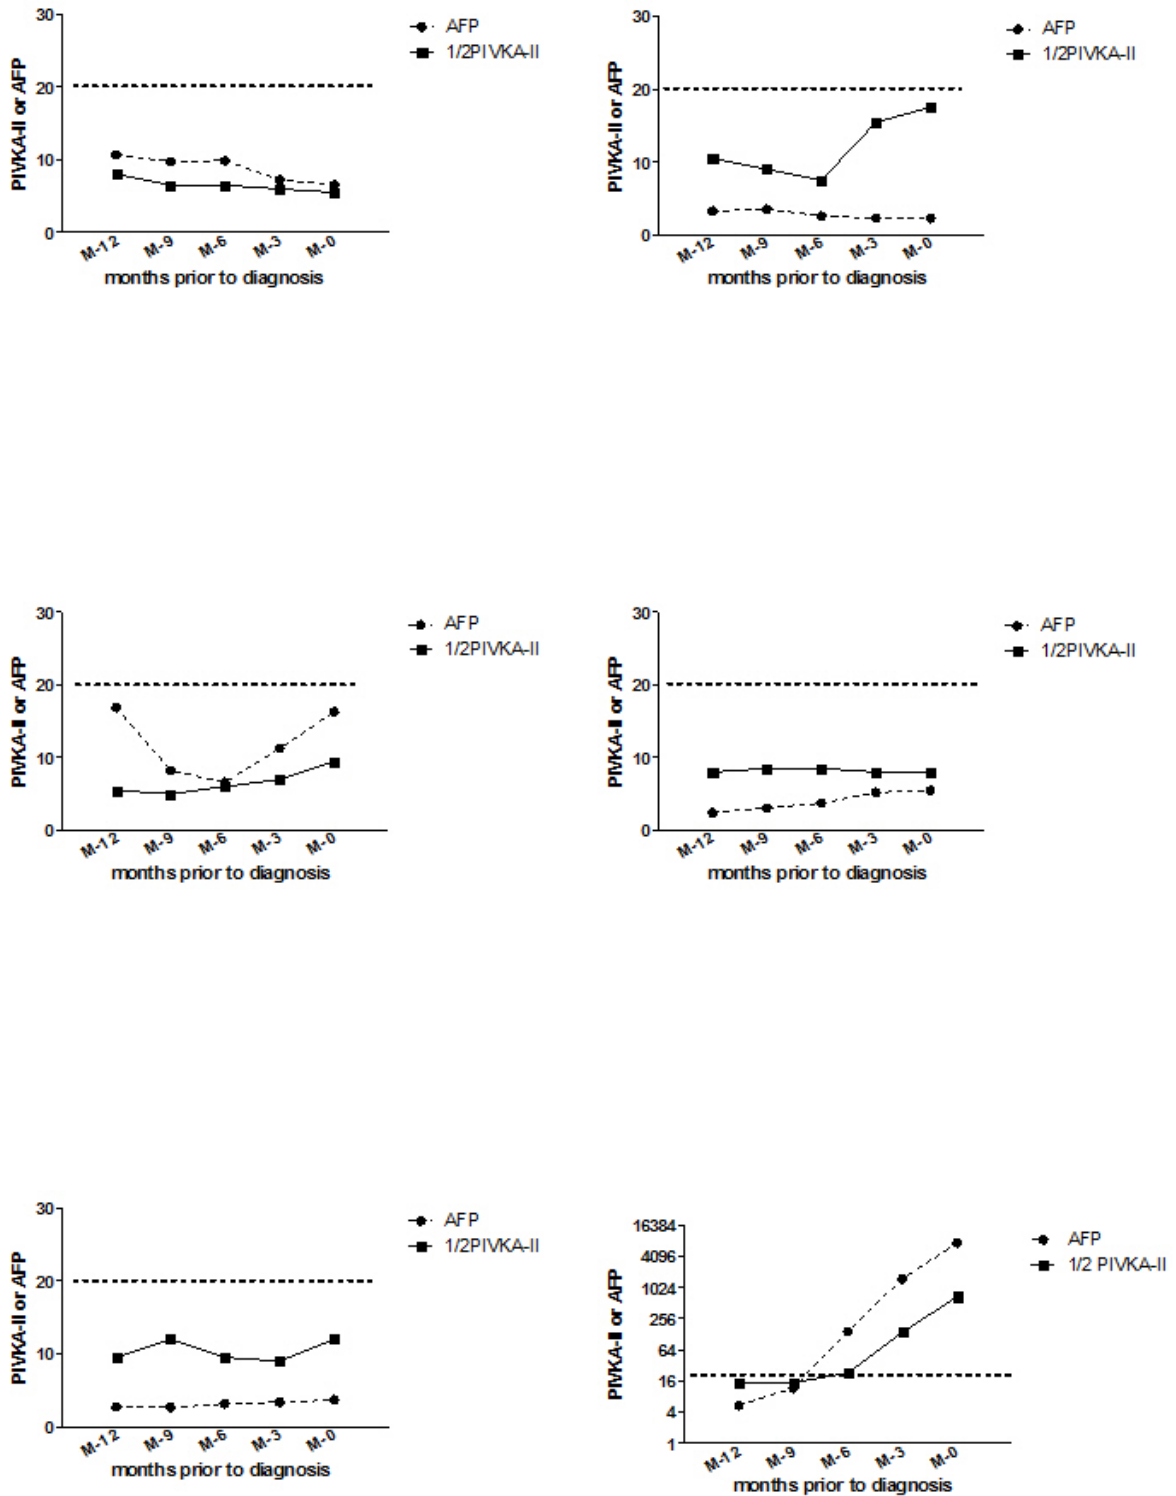

**Supplementary Fig. 2** Chang trends of AFP and PIVKA-II serum level in each HCC patients at **validation stage**. Each figure shows the change trend of biomarkers' trend of a HCC patient from 12 months prior to diagnosis to the diagnosis time. The horizontal dotted line refers to the cut-off value. PIVKA-II levels were reduced to 1/2 so as to keep a same cut-off value as AFP. PIVKA-II: Protein Induced by Vitamin K Absence or Antagonist-II; AFP:  $\alpha$ -fetoprotein.
